# Supplementary material for: Fungal spores overwhelm biogenic organic aerosols in a mid-latitudinal forest
Source: Copernicus journal article supplement (doi:10.5194/acp-2015-671), 2016-02-04
Supplement: Supplementary file 1 [file acp-2015-671-supplement.pdf]

**Supporting Information**

1

2

3

4 This file includes Figure S1.

5

6

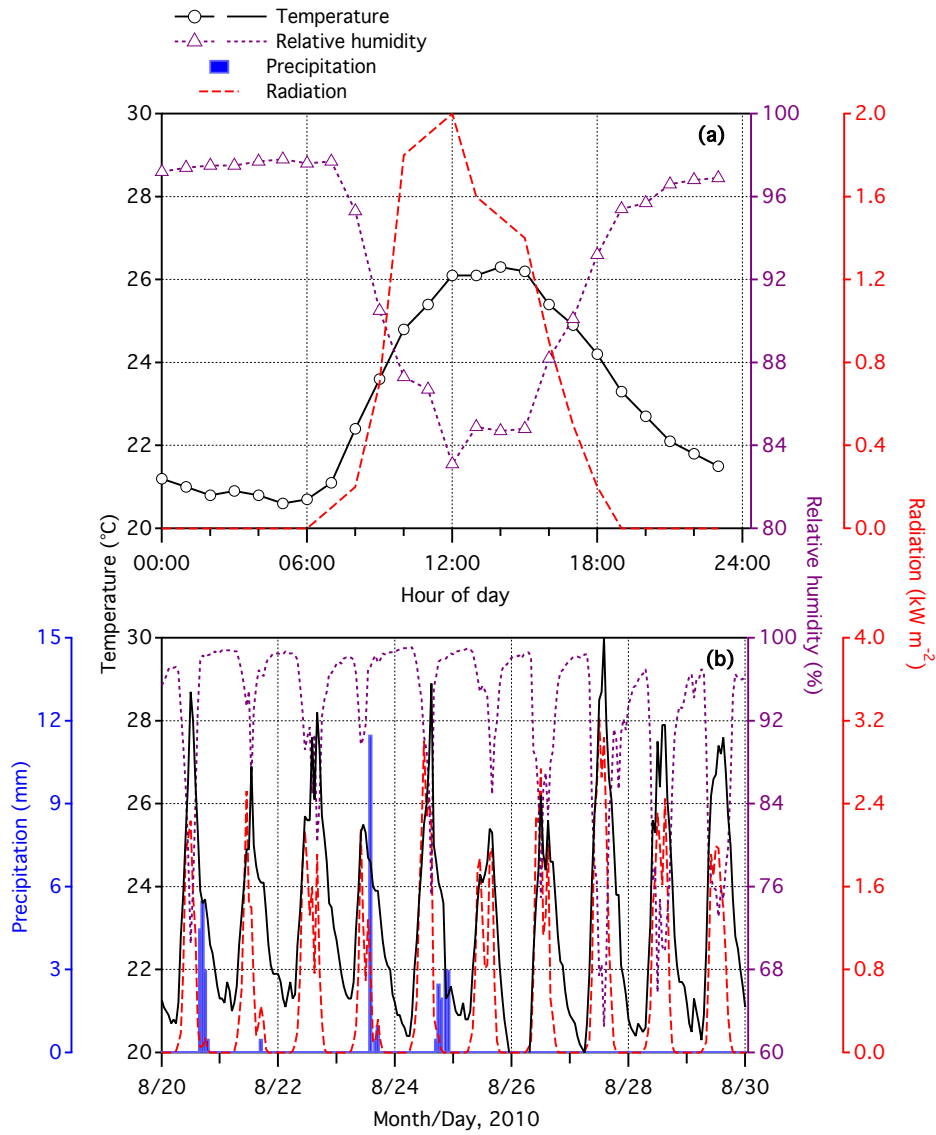

7 Figure S1. Meteorological parameters over August 20–30, 2010 at Wakayama forest, for (a)

8 averaged diurnal variations of temperature, relative humidity and solar radiation, and (b)

9 hourly means over the periods. Hourly precipitation was also shown in panel (b).

10
