# Supplementary material for: Fungal spores overwhelm biogenic organic aerosols in a mid-latitudinal forest
Source: Copernicus journal article supplement (doi:10.5194/acp-2015-671), 2016-02-04
Supplement: Supplementary file [file acp-2015-671-AC1-supplement.pdf]

## Authors' Responses to Referees' Comments

### Anonymous Referee #1

The manuscript "Fungal spores overwhelm biogenic organic aerosols in a mid- latitudinal forest" describes biomarkers of PBAP and secondary organic aerosols (SOA) for their diurnal variability in a temperate coniferous forest in Wakayama, Japan. This paper, present for the first time highly time-resolved results that fungal spores overwhelmed BVOC oxidation products in contributing to OA especially in nighttime. In general, this manuscript is well organized and the discussion is reasonable. Thus, I believe it can be accepted after a minor revision.

Response: We are grateful to the referee for the positive evaluation on our work. We have adopted most of the comments to improve the manuscript substantially.

Major comments:

(1) Updating the references used in this manuscript to more current state is suggested.

Response: We have checked and updated the references to the up-to-date versions as suggested.

(2) Experimental section should include detailed information about the statistical analysis conducted in the manuscript.

Response: We added the following paragraph describing statistical analysis methods in L143-148 in the revision:

"Statistical significances of daytime and nighttime organic tracers were evaluated based on Student's t-test at  $p < 0.05$  and  $p < 0.01$  level, respectively. To explore the effects of anthropogenic pollutant inputs on BSOA formation, linear correlations (Pearson) between SOA tracers and  $\text{NO}_3^-$  and  $\text{SO}_4^{2-}$  were investigated. The contributions from various sources to OC were estimated using tracer-based methods using conversion factors according to the preceding studies".

(3) Line 105: A stability study for molecules should be added, for how kept the quartz samples and how long and where kept the liquid samples before analysis?

Response: Each of the quartz samples were kept in a sealed glass jar at  $< -20$  °C during transport (see the following photo of sample storage in the field, the actually temperature was  $-27.3$ °C). The quartz filters were then stored at  $\sim -20$  °C in the laboratory prior to chemical analysis. We consider that the chemical losses were not large under the low temperature and sealed condition. The extracted liquids were kept at  $\sim -20$  °C for within 24 h prior to GC/MS determination. These points were added in the revised manuscript. Please see lines 102-105 and 122-123.

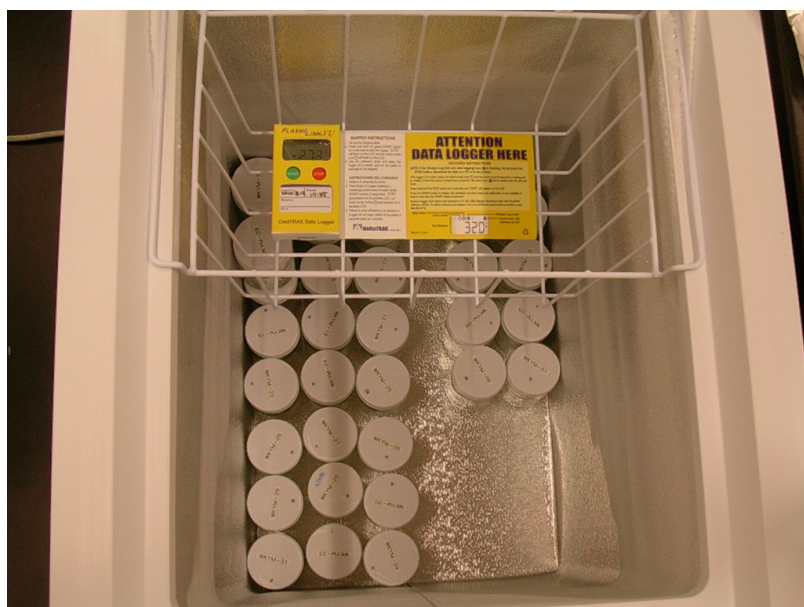

(3) Line 226: A deep discussion about Table 1 should be added. Why isoprene-SOA tracers and monoterpene-SOA tracers showed positive relationship with  $\text{SO}_4^{2-}$  and no relationship with  $\text{NO}_3^-$ . Moreover, a deep discussion of the relevant mechanism of  $\text{SO}_4^{2-}$  and SOA tracers should be added.

Response: We consider that aerosol  $\text{SO}_4^{2-}$  was mainly derived from anthropogenic sources. The positive relations between SOA tracers and  $\text{SO}_4^{2-}$  could be caused by (1) the parallel transport of regional BSOA and anthropogenic pollutants such as  $\text{SO}_4^{2-}$ , (2) gas-to-particle partition of SOA promoted by  $\text{SO}_4^{2-}$  and (3) formation of SOA tracers. These possible reasons were discussed in details in L246-262.

On the other hand, although there are several possibilities for the "absence" of correlations between  $\text{NO}_3^-$  and SOA tracers, we would not discuss the issue in details, as aerosol  $\text{NO}_3^-$  is not our focus in this study. Taking the referee's comments, we revised from "...is not clear in Wakayama aerosols" to "is not clear in Wakayama aerosols, which deserve further investigations" in L265-266.

(4) Line 155: A large part of section 3.1 and 3.2 refers to supplemental material information making it hard for this reviewer/reader to follow.

Response: Taking the comment, we moved Figure S1, which is referred in section 3.1 and 3.2, to the manuscript.

(5) The authors claimed that fungal spores overwhelmed BVOC oxidation products in contributing to OA, which is opposite to previous studies. However, there was not any reference and no data from other literature compared. More discussion or explanation should be added to support this conclusion.

Response: Given the complicated nature of OA/OC sources, there are few studies so far on the quantification of OA/OC fraction from different sources. As far as the literatures of the same nature we reviewed, we compared our results with two relevant studies, of which one is from a forest site in the Amazonia (Pöschl et al., Science, 2010) and the other one is from an urban site (Zhao et al., JGR, 2013). Our results are in accordance with those in the Amazon rainforest, where primary biological aerosol and SOA accounted for 68.5% and 18.8% of total particle masses, but differs from those in the urban site. These discussions were shown in L305-311. We believe that our results are informative enough to compare with other studies in the same nature, which is still lacking in the atmospheric chemistry community.

-----

#### **Anonymous Referee #2**

Zhu et al report on biological aerosol particles contribution to organic aerosol (OA) at a fine temporal scale. Their main finding is that fungal spores overwhelm BVOC oxidation products

in terms of % contribution to OA, especially at night time due to sporulation and absence of photochemistry (45% vs 15%), but also at daytime (22% vs 19%). The paper is well written and presents novel data, and is worth to be published after revisions as detailed below. While I find that the sampling methodology, the analytical and chemical sections and discussions are sound and consistent, the interpretations the authors give of observed patterns in light of atmospheric dynamic are often weak and sometimes wrong in my opinion. Overall they are not supported by any atmospheric data, nor local meteorological or micrometeorological data, nor trajectory analysis. This lack of analysis makes all the atmospheric arguments rather speculative. I strongly encourage to make use of the data that are available to support the discussion, especially a back-trajectory analysis would be informative, coupled at least to local wind-rose analysis. Mesoscale model runs (WRF etc) would be also very helpful if feasible. The discussion needs to be refocused based on the available data.

Response: We thank Referee #2 for the positive evaluation of our work. We are grateful for the invaluable comments that allow us to improve the manuscript mainly from the viewpoint of atmospheric transport. As a matter of fact, the development and discussion through the manuscript was indeed on a basis of the atmospheric transport.

Major comments:

L97 - 104: the authors divide the study period (10 days) into two 5 days sub-periods: “During August 20–25, air masses originated from the Asian continent or passed over the Japanese islands brought pollutants from anthropogenic sources, while during August 26–30 air masses originated from the western North Pacific, which create an environment close to the pristine forest”

This is a superficial assumption not supported by any atmospheric circulation-back trajectory analysis. I did some very basic back-trajectory with Hysplit (see figure), showing that while the backward oceanic circulation (on the sampling day Aug 28) is indeed very clear (red trajectory), the terrestrial land influence (sampling day on Aug 23) is not (green). Winds are very weak, making the assessment of the air mass origin quite difficult, and the time scales involved very long. On a 72 hrs scale (see figure), if there is any land influence it appears more

from Japan than from Asian continent. Then saying that continental air masses carry anthropogenic pollution signatures is also not supported, since this will depend again on the air mass trajectory (pollution sources concentrate in cities that are a minor fraction of land cover).

Response: We appreciate for the referee's validation on the backward trajectories of August 28 and August 23. The results, as was shown in the figure of the comment letter, provided accordance with our manuscript starting from August 28, but a shorter transport distance for a duration of 72 hours starting from August 23. It is noteworthy that HYSPLIT backward trajectory varied depending on start time of the day and the start height. Therefore, other than one single calculation, the statistical results of backward trajectory calculations of all hours of a day, and attempt to start from several heights are supposed to provide more reliable results. To this point, Han et al. (JGR, 2014) calculated 24 hours (namely 24 starting time points) for each day over the sampling period (Figure 4 in the original paper). The results clearly show that during 20–25 August 2010, the sampling site was mainly affected by the continental outflow. On the other hand, Han et al. (Atmos. Environ., 2013) also obtained consistent results when examining backward trajectories starting at different height (500 m, 1000 m and 1500 m above the ground level) (Figure 1 in the original paper) and at 9:00 am local time on each day. Therefore, we believe that it is reasonable to divided the sampling period into those two sub-periods on a basis of the backward trajectories. We addressed this point more explicitly by revising the manuscript. Please see L108-115 in the revised manuscript as follows: "Of the whole sampling period, the backward trajectories were calculated using HYSPLIT dispersion model starting at every hour of the day and for different starting height (500m, 1000m and 1500m above ground level) (Han et al., 2013, 2014). It can be seen that the air masses were mainly originated from the Asian continent or passed over the Japanese islands during August 20–25, which were expected to deliver pollutants from anthropogenic sources. On the other hand, air masses were mainly originated from the western North Pacific during August 26–30, which create an environment close to the pristine forest."

L168-170: "Insignificant diurnal variations of these two compounds imply that they were emitted ubiquitously in the forest possibly from plants and microorganisms".

I do not agree here: absence of diurnal variation of a compound is likely because it is not emitted at all, and the measured signal mostly advected. If there's an ubiquitous emission, we should more see a diurnal trend, driven by PBL growth during the day and collapsing at night.

Response: As glucose and fructose are dominantly originated from plant debris and other biogenic sources as discussed in L184-186, it is reasonable to say that the local vegetation is a dominant source of these compounds. We agree with the referee's comment that the diurnal variation of planetary boundary layer height could contribute to the variation of glucose and fructose. Taking the comment, we rephrased the sentences to "Insignificant diurnal variations of these two compounds imply that they were emitted both in the daytime and the nighttime in the forest possibly from plants and microorganisms (Figure 1a–b, 3a). The diurnal variation of planetary boundary layer height could also contribute to the observed variations of glucose and fructose and other PBAP tracers. In the daytime, enhanced vertical mixing might cause dilution effect to the observed PBAP tracers. While in the nighttime, the low wind speed favors the buildup of PBAP tracers in the canopy (Figure S1), resulting in the elevated levels (Figure 3a, b)." Please see lines in L187-194 in the revised manuscript.

L185-187: "The diurnal variation of levoglucosan with daytime maxima in the Wakayama aerosols indicates that the Asian outflow of biomass burning emissions approached to the sampling site."

Again this is not adequately supported with trajectory analysis, see also comment above. If there's any (and it appears not) influence of Asian continent, this will act on a multi-day scale (distance > 1000 km!), so linking this hypothetical difference to the daytime-nighttime difference makes no sense.

L182 . . . "sea-breeze circulations at day and drainage flows at night". Again not supported. Here the authors are going on a finer scale interpretation (local sea breeze developments) that is mixed with the long range transport interpretation (the Asian outflow..). Is at least wind speed and direction supporting the sea breeze regime? No wind data is reported in the study.

Response: Taking the comments with respect to L185-187 and L182 in the previous version manuscript, we newly analyzed the local wind direction/speed and put it in the supporting information (Figure r1 in this response letter). Regarding the long-distant transport, the backward analysis as described above indicated that the sampling site was most likely affected by the regional aerosols from Asian continent and Japan. While the low wind speed in the nighttime favors deposition, causing low levoglucosan level. Taking the next comment on L182 together, we revised the content as follows: “). In the nighttime, levoglucosan may have been deposited to the canopy as a result of dampened vertical mixing and relatively low wind speed (Figure S1)”. Please see L204-206 in the revised manuscript.

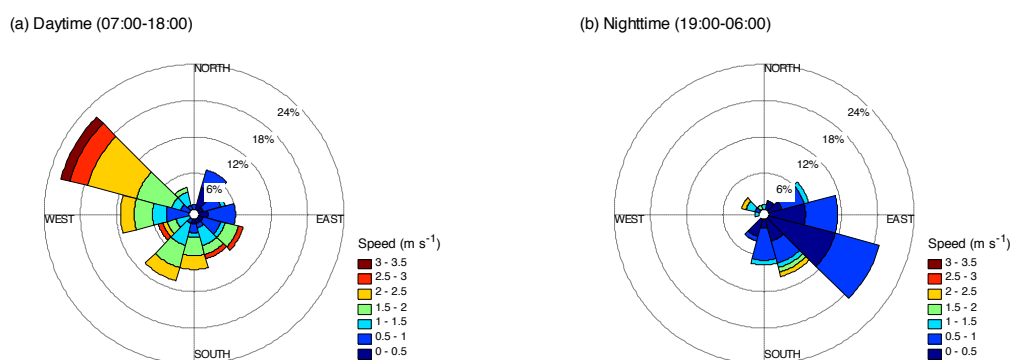

Figure r1. Frequency distributions of wind direction and wind speed over August 20–30, 2010 at Wakayama forest in (a) the daytime and (b) the nighttime. The wind direction and wind speed data were obtained at Shimizu observation site from Japan Meteorological Agency.

Fig 2 (hourly patterns) reveals interesting patterns: while BVOC patterns are more clear and consistent (panels c and d) with photochemical activity, some other are less (a, b). Some more interpretation in the light of night accumulation and turbulent mixing built up in the morning could improve the analysis, again depending on wind-turbulence data availability.

Response: Taking the comment, we newly analyzed the diurnal pattern of PBAP tracers together with meteorological information on wind speed and wind direction. We added the following sentences in the revised manuscript: “The diurnal variation of planetary boundary

layer height could also contribute to the observed variations of glucose and fructose and other PBAP tracers. In the daytime, enhanced vertical mixing might cause dilution effect to the observed PBAP tracers. While in the nighttime, the low wind speed favors the buildup of PBAP tracers in the canopy (Figure S1), resulting in the elevated levels (Figure 3a, b).” in L189-194.

Minor:

L71-73: also PTR-MS technology to measure BVOC continuously in field.

Response: We did not find relevant content in L71-73. The referee should be talking on the research background with respect to the measurement methods. Taking the comment, we added “BVOC could also be monitored on real time using Proton Transfer Reaction – Mass Spectrometry (PTR–MS) technology (Blake et al., 2009).” Please see L78-79 in the revised manuscript.

L136: it appears text is confounding fungus with tracers? Please clarify this section, also better supporting the use of those sugar alcohols as PBAP tracers. How consolidates is this assumption? what limitations? what accuracy in estimating PBAP indirectly.

Response: We checked over the context and clarified the usage of fungal spore tracers from fungal spore. We clearly described that we used sugar alcohols to investigate fungal spore and other organic compounds for other PBAPs with headlines of 3.1 “PBAP tracers reflecting diurnal rhythm of fungal spores and pollen” (please see L151), 3.1.1 “Fungal spore tracers” and 3.1.2 “Other PBAP tracers and levoglucosan”. The same kind of description was also shown as “Trehalose, arabitol and mannitol were the major species of fungus and have been used as tracers for fungal spores (Jia and Fraser, 2011)” in L155-156.

The tracer-based methods for the estimation of PBAPs had been widely applied in the community. Given the complicated nature of PBAPs, it is not applicable to estimate the uncertainty for the moment. We described this precaution as “It is noteworthy that, although each tracer method gave a reasonable estimate in the original studies, uncertainties would be introduced in the current study considering the site differences. Still, the estimations are



inferable for the contributions from each source to OC in the forest aerosols.” Please see L275-278 in the revised manuscript.

L162-164: can this be better supported? pollen sampling?

Response: We did not find relevant content in L162-164 in the previous version of manuscript. The referee should be talking about the source of sucrose and pollen in L180-183. For the moment we did not conduct a pollen sampling experiment. The information about the local vegetation and the blossom season is based on the biogeography of the site, which was obtained from filed surveys.

#### **Other changes:**

1. We updated the authors' information in L4-9.
2. We corrected the flow rate during sampling to  $\sim 60 \text{ m}^3 \text{ h}^{-1}$  in L101.
3. We corrected from “are the some of” to “are the sum of” in L516.
4. We added “appreciate ... technical support of W. Zhang” in the Acknowledgement.

#### **References**

- Han, Y., Iwamoto, Y., Nakayama, T., Kawamura, K., Hussein, T., and Mochida, M.: Observation of new particle formation over a mid-latitude forest facing the North Pacific, *Atmos. Environ.*, 64, 77–84, 2013.
- Han, Y., Iwamoto, Y., Nakayama, T., Kawamura, K., and Mochida, M.: Formation and evolution of biogenic secondary organic aerosol over a forest site in Japan, *J. Geophys. Res.*, 119, 259–273, 2014.

## Fungal spores overwhelm biogenic organic aerosols in a mid-latitude forest

Chunmao Zhu<sup>1,2</sup>, Kimitaka Kawamura<sup>1,3</sup>, Yasuro Fukuda<sup>1,4</sup>, Michihiro Mochida<sup>5</sup>, Yoko Iwamoto<sup>5,6</sup>

<sup>1</sup> Institute of Low Temperature Science, Hokkaido University, Sapporo 060-0819, Japan

<sup>2</sup> CMA Key Laboratory of Aerosol-Cloud-Precipitation, Nanjing University of Information Science and Technology, Nanjing 210044, China

<sup>3</sup> Now at Chubu Institute for Advanced Studies, Chubu University, Kasugai 487-8501, Japan

<sup>4</sup> Graduate School of Environmental Studies, Hokkaido University, Sapporo, Japan

<sup>5</sup> Graduate School of Environmental Studies, Nagoya University, Nagoya 464-8601, Japan

<sup>6</sup> Now at Faculty of Science Division I, Tokyo University of Science, Tokyo 162-8601, Japan

Contact author: Kimitaka Kawamura ([kkawamura@isc.chubu.ac.jp](mailto:kkawamura@isc.chubu.ac.jp)) and Chunmao Zhu ([chmzhu@pop.lowtem.hokudai.ac.jp](mailto:chmzhu@pop.lowtem.hokudai.ac.jp)).

Formatted: Heading 2, section 1.1, Left, Line spacing: single

Formatted: Numbering: Continuous

Deleted: Chunmao Zhu<sup>1</sup>, Kimitaka Kawamura<sup>1</sup>, Yasuro Fukuda<sup>1</sup>, Michihiro Mochida<sup>2</sup>, Yoko Iwamoto<sup>2,3</sup>. ... [1]

21 **Abstract**

22 Both primary biological aerosol particles (PBAP) and oxidation products of biogenic  
23 volatile organic compounds (BVOC) contribute significantly to organic aerosols (OA) in  
24 forested regions. However, little is known on their relative importance in diurnal time scales.  
25 Here, we report biomarkers of PBAP and secondary organic aerosols (SOA) for their diurnal  
26 variability in a temperate coniferous forest in Wakayama, Japan. Tracers of fungal spores,  
27 trehalose, arabinol and mannitol, showed significantly higher levels in nighttime than daytime  
28 ( $p < 0.05$ ), resulting from the nocturnal sporulation under near saturated relative humidity. On  
29 the contrary, BVOC oxidation products showed higher levels in daytime than nighttime,  
30 indicating substantial photochemical SOA formation. Using tracer-based methods, we  
31 estimated that fungal spores account for 45% of organic carbon (OC) in nighttime and 22% in  
32 daytime, whereas BVOC oxidation products account for 15% and 19%, respectively. To our  
33 knowledge, we present for the first time highly time-resolved results that fungal spores  
34 overwhelmed BVOC oxidation products in contributing to OA especially in nighttime. This  
35 study emphasizes the importance of both PBAPs and SOAs in forming forest organic aerosols.

36

37 **Keywords:** primary biological aerosol particles; fungal spores; biological volatile organic  
38 compounds; organic aerosols.

## 39 1. Introduction

40 Biogenic particles and gases emitted from various vegetation types affect earth climate,  
41 biogeochemical cycles of carbon and nitrogen, air quality and human health. Particles such as  
42 fungal and fern spores, bacteria, viruses, algae, vegetation debris and pollen are directly  
43 emitted and thus termed as primary biological aerosol particles (PBAP) (Després et al., 2012;  
44 Elbert et al., 2007). Being mostly in the size range of 0.1–100  $\mu\text{m}$ , PBAPs often contribute to  
45 a large mass fraction of organic aerosols (OA) but a small fraction of total particles (Pöschl et  
46 al., 2010). On the other hand, biogenic volatile organic compounds (BVOC) are highly  
47 reactive and thus subjected to photooxidation to form fine particles of secondary organic  
48 aerosols (SOA) and gas/particle partitioning of the reaction products (Claeys et al., 2004).  
49 There are substantial progresses in understanding the source strengths, composition and  
50 atmospheric transformations of biogenic particles, however, their contributions to OA and  
51 hence forces of their effects on climate are still uncertain.

52 Global PBAP emission is as high as 1000  $\text{Tg y}^{-1}$  (Jaenicke, 2005). Fungal spore is the  
53 dominant component with the emission strengths of 8 to 186  $\text{Tg y}^{-1}$  (Després et al., 2012;  
54 Elbert et al., 2007; Heald and Spracklen, 2009). Fungal spores (1–30  $\mu\text{m}$ ) could account for up  
55 to 45% of coarse particulate matter (Fröhlich-Nowoisky et al., 2009). In contrast, global  
56 bacteria emissions are much smaller with abundances of 0.04–1.8  $\text{Tg y}^{-1}$  (Burrows et al.,  
57 2009). Pollen could contribute up to 65% of total PBAP mass in the flowering season,  
58 although their number contribution is only ~1% of total PBAP (Manninen et al., 2014).  
59 Certain PBAPs showed close correlations with atmospheric cloud condensation nucleus  
60 (CCN) and ice nucleus (IN) (Hiranuma et al., 2015; Huffman et al., 2013). However,  
61 simulations indicated that PBAPs are of regional importance for IN formation as they

62 contribute very little to global average ice nucleation rates (Hoose et al., 2010; Spracklen and  
63 Heald, 2014). Unveiling PBAP mass concentrations is necessary to provide benchmarks for  
64 simulating its nucleation potentials and the effect on the climate.

65 The most widely studied BVOCs are isoprene ( $C_5H_8$ ), monoterpenes ( $C_{10}H_{16}$ ) and  
66 sesquiterpenes ( $C_{15}H_{24}$ ). Global emission of isoprene ( $309\text{--}706\text{ Tg C yr}^{-1}$ ) accounts for ~50%  
67 of total BVOC (Acosta Navarro et al., 2014; Guenther et al., 2006). Monoterpenes (~10% of  
68 total VOCs) and sesquiterpenes are other important SOA precursors (Ziemann and Atkinson,  
69 2012). Atmospheric oxidation of these BVOCs depends on oxidant levels ( $NO_x$  and  $O_3$ ),  
70 humidity, light and temperature. Recent studies indicated that biogenic SOA production could  
71 be enhanced under the input of anthropogenic oxidants (Carlton et al., 2010). Under pristine  
72 conditions, BVOC oxidation and SOA formation are often accompanied by new particle  
73 formation, involving in precipitation through increasing CCN and IN numbers (Pöschl et al.,  
74 2010). The formation of SOA is often in the fine particle size (Pöschl et al., 2010), however,  
75 the relative importance of PBAPs and SOA in contributing to OA is still ambiguous.

76 Various observational methods have been applied to explore PBAPs and SOA in natural  
77 environment both qualitatively and quantitatively. Applications of ultraviolet aerodynamic  
78 particle sizers and wideband integrated bioaerosol sensor based on fluorescence provided  
79 much information on the abundances and size distributions of PBAP (Huffman et al., 2010;  
80 Pöhlker et al., 2012). In situ observations of SOA are frequently conducted using aerosol mass  
81 spectrometer (AMS) (Zhang et al., 2007). [BVOC could also be monitored on real time using](#)  
82 [Proton Transfer Reaction – Mass Spectrometry \(PTR–MS\) technology \(Blake et al., 2009\).](#)  
83 Detections of organic tracer compounds using gas chromatography combined with mass  
84 spectrometry (GC/MS) make it possible to compare both PBAP and SOA sources

85 simultaneously (Graham et al., 2003). Progresses are achieved in boreal forest (Kourtchev et  
 86 al., 2008) and the Amazon (Graham et al., 2003). However, few studies focused on the mid-  
 87 latitudinal forest with high time resolution (Miyazaki et al., 2012; Mochizuki et al., 2015).

88 In this study, we collected daytime and nighttime samples in a mid-latitude forest in  
 89 Wakayama, Japan and analyzed the organic samples for various PBAP and SOA tracers using  
 90 GC/MS. We report for the first time that fungal spores overwhelm BSOA in contributing to  
 91 aerosol organic carbon (OC). We also report diurnal variations of PBAP tracers that reflect the  
 92 natural rhythm of the forest.

93

## 94 2. Experimental

### 95 2.1 Site and sampling

96 Aerosol sampling was conducted in August 20–30, 2010 during a field campaign at  
 97 Wakayama Forest Research Station, Kyoto University, in the Kii Peninsula, Japan (34.07 °N,  
 98 135.52 °E, ca. 750 m above sea level) (Han et al., 2013; Han et al., 2014). The dominant  
 99 species of the forest vegetation are coniferous trees of *Cryptomeria japonica* (Japanese cedar),  
 100 *Chamaecyparis obtuse* (Japanese cypress) and *Pinus densiflora* (Japanese red pine). Previous  
 101 studies indicated that monoterpenes are abundantly emitted from these tree species  
 102 (Matsunaga et al., 2011; Mochizuki et al., 2011). Total suspended particulate (TSP) samples  
 103 were collected on pre-combusted (450 °C, 6 h) quartz filters (Pallflex 2500QAT-UP, 20 cm ×  
 104 25 cm) using a high-volume air sampler (Kimoto AS-810B) at a flow rate of  $\sim 60 \text{ m}^3 \text{ h}^{-1}$  at the  
 105 ground level. Each of the quartz samples were kept in a sealed glass jar at  $< -20 \text{ }^\circ\text{C}$  during  
 106 transport. The quartz filters were then stored at  $\sim -20 \text{ }^\circ\text{C}$  in the laboratory prior to chemical  
 107 analysis. We believe that the chemical losses were not large under the low temperature and

Deleted: L

Deleted: min

Formatted: Superscript

Formatted: Font color: Auto

110 sealed condition (Kawamura et al., 2010). During the campaign, four field blanks were  
 111 collected following the sampling procedures, except for the running of pump for only 10  
 112 seconds.

113 Nighttime (from ~18:00 to next ~6:00 local time, LT) and daytime (from ~6:00 to ~18:00  
 114 LT) samples were collected separately each day. Of the whole sampling period, the backward  
 115 trajectories were calculated using HYSPLIT dispersion model starting at every hour of the day  
 116 and for different starting height (500m, 1000m and 1500m above ground level) (Han et al.,  
 117 2013, 2014). It can be seen that the air masses were mainly originated from the Asian  
 118 continent or passed over the Japanese islands during August 20–25, which were expected to  
 119 deliver pollutants from anthropogenic sources. On the other hand, air masses were mainly  
 120 originated from the western North Pacific during August 26–30, which create an environment  
 121 close to the pristine forest. On August 23 and 28, samples were collected every 3 hours

122 (namely, 6:00–9:00, 9:00–12:00, 12:00–15:00, 15:00–18:00, 18:00–21:00, 21:00–24:00,  
 123 24:00–3:00, and 3:00–6:00 LT). A total of 36 samples were collected during the campaign.

## 124 2.2 Chemical analysis

125 For the determination of organic molecular tracers in aerosols, filter samples were first  
 126 extracted with dichloromethane/methanol and derivatized by N,O-bis-  
 127 (trimethylsilyl)trifluoroacetamide (BSTFA) mixed with pyridine to convert OH groups to  
 128 trimethylsilyl (TMS) ethers and COOH groups to TMS esters (Simoneit et al., 2004). The  
 129 extracts were kept at ~-20 °C and then organic compounds were quantified within 24 h by  
 130 GC/MS using an Agilent 7890A GC equipped with HP-5ms capillary column (30 m × 0.25  
 131 mm × 0.25 μm) coupled to Agilent 5975C mass-selective detector (MSD). Individual  
 132 compounds were identified by comparing the mass spectra with those of authentic standards or

Formatted: Font color: Auto

**Deleted:** Depending on the air mass origins, the sampling period could be divided into two sub-periods. During August 20–25, air masses originated from the Asian continent or passed over the Japanese islands brought pollutants from anthropogenic sources, while during August 26–30 air masses originated from the western North Pacific, which create an environment close to the pristine forest (Han et al., 2013; Han et al., 2014)

**Deleted:** Organic

**Deleted:** in the extracts were then

143 literature data and quantified by comparing the peak areas with the internal standard (C<sub>13</sub> n-  
144 alkane) (Zhu et al., 2015b). Recoveries for the authentic standards or surrogates were  
145 generally better than 80%, except for pinonic acid of ~60%, as obtained by spiking standards  
146 to pre-combusted quartz filters following extraction and derivatization. No peak was found for  
147 the target compounds in the field and laboratory blanks. The analytical errors by duplicate  
148 analyses were less than 15%. The detection limits of the reported compounds were 105–557  
149 pg μl<sup>-1</sup>, which correspond to ambient concentrations of 12–64 pg m<sup>-3</sup> under a typical sampling  
150 volume of 700 m<sup>3</sup> and usage of 10 cm<sup>2</sup> filter section.

151 Aerosol OC was determined using a thermal/optical carbon analyzer (Sunset Laboratory  
152 Inc., USA) following the Interagency Monitoring Protected Visual Environments (IMPROVE)  
153 thermal evolution protocol (Birch and Cary, 1996). The analytical error in replicate analyses  
154 was within 8%. Samples were corrected for field blanks, in which OC level was < 5% of the  
155 samples. Inorganic ions were measured using an ion chromatograph (761 Compact IC,  
156 Metrohm, Switzerland). SO<sub>4</sub><sup>2-</sup> and NO<sub>3</sub><sup>-</sup> were discussed in the study. The detection limits  
157 were ~0.1 ng m<sup>-3</sup>. The laboratory analytical error was within 5%. Samples were corrected for  
158 field blanks.

159 Statistical significances of daytime and nighttime organic tracers were evaluated based on  
160 Student's t-test at p < 0.05 and p < 0.01 level, respectively. To explore the effects of  
161 anthropogenic pollutant inputs on BSOA formation, linear correlations (Pearson) between  
162 SOA tracers and NO<sub>3</sub><sup>-</sup> and SO<sub>4</sub><sup>2-</sup> were investigated. The contributions from various sources  
163 to OC were estimated using tracer-based methods using conversion factors according to the  
164 preceding studies.

165



### 166 3. Results and discussion

#### 167 3.1 PBAP tracers reflecting diurnal rhythm of fungal spores and pollen

##### 168 3.1.1 Fungal spore tracers

169 Four primary saccharides (trehalose, glucose, fructose and sucrose) and four sugar alcohols  
170 (arabitol, mannitol, inositol and erythritol) were detected in the forest aerosols as PBAP  
171 tracers. Trehalose, arabitol and mannitol were the major species of fungus and have been used  
172 as tracers for fungal spores (Jia and Fraser, 2011). These compounds showed significantly  
173 higher levels in nighttime ( $262 \pm 168$ ,  $156 \pm 102$  and  $349 \pm 243$  ng m<sup>-3</sup> for trehalose, arabitol  
174 and mannitol, respectively) than in daytime ( $128 \pm 90.2$ ,  $76.0 \pm 54.9$  and  $183 \pm 139$  ng m<sup>-3</sup>,  
175 respectively) (T-test,  $p < 0.05$ , Figure 1d–f). High abundances of these fungal spore tracers  
176 were resulting from the nocturnal sporulation under near saturated relative humidity (Figure  
177 2). In nighttime, the mean relative humidity was 96% in the sampling period. Nevertheless, the  
178 mean daytime relative humidity was still as high as 88%. Such a moist environment caused  
179 enrichment of fungal spores and their discharges, resulting high abundances of their tracer in  
180 aerosols. The sum of trehalose, arabitol and mannitol contributed to 70% of total PBAP tracer  
181 mass, demonstrating an important role of fungi in regulating the land-atmosphere exchange in  
182 the forest region.

183 Diurnal profiles of fungal spore tracers showed similar pattern on August 23 and August  
184 28, two typical days representing regional and local phenomenon, respectively. Minima of  
185 trehalose, arabitol and mannitol appeared around the noontime and increased dramatically in  
186 the evening on both days (Figure 3). On August 23, fungal spore tracers peaked at 21:00–  
187 24:00 LT and decreased slowly thereafter. In comparison, these compounds peaked slightly  
188 earlier at 18:00–21:00 LT on August 28. The maxima of these compounds on August 23 were

Deleted: S1

Deleted: 2

191 higher by a factor of ~1.5 than those on August 28. This phenomenon was likely related to the  
 192 precipitation that occurred at 13:00–17:00, August 23 (Figure 2), which favors the growth and  
 193 release of fungal spores.

### 194 3.1.2 Other PBAP tracers and levoglucosan

195 Sucrose, a key component of pollen grain (Yttri et al., 2007), showed significantly higher  
 196 levels ( $p < 0.01$ ) in daytime ( $31.9 \pm 17.7 \text{ ng m}^{-3}$ ) than nighttime ( $14.6 \pm 14.2 \text{ ng m}^{-3}$ ) (Figure  
 197 1c). The diurnal profile of sucrose showed peaks in the afternoon (Figure 3a), indicating the  
 198 flowering time of the vegetation. As the blossom season of the dominant coniferous trees is  
 199 March–April in the region, the source of sucrose is likely from the pollen of the widely  
 200 distributed floor vegetation, *Ambrosia artemisiifolia*, *Artemisia indica*, and plants of *Poaceae*  
 201 family, which are flowering during the sampling period.

202 Glucose and fructose are originated dominantly from plant debris (Medeiros et al., 2006;  
 203 Zhu et al., 2015a), and sometimes from microorganisms and soil dust (Rogge et al.,  
 204 2007; Simoneit et al., 2004). There was no serious continental outflow of Asian dust over the  
 205 sampling period (based on observations by Japan Meteorological Agency). Insignificant  
 206 diurnal variations of these two compounds imply that they were emitted both in the daytime  
 207 and the nighttime in the forest possibly from plants and microorganisms (Figure 1a–b, 3a).

208 The diurnal variation of planetary boundary layer height could also contribute to the observed  
 209 variations of glucose and fructose and other PBAP tracers. In the daytime, enhanced vertical  
 210 mixing might cause dilution effect to the observed PBAP tracers. While in the nighttime, the  
 211 low wind speed favors the buildup of PBAP tracers in the canopy (Figure S1), resulting in the  
 212 elevated levels (Figure 3a, b). Interestingly, the mass concentrations of glucose were one order  
 213 of magnitude higher than those of fructose. This might be related to the higher abundance of

Deleted: S1

Deleted: 2a

Deleted: that

Deleted: ubiquitously

Deleted: 2a

219 glucose in trees. For example, tissues of a wide range of subtropical plants were found to  
 220 contain more glucose than fructose (Baker et al., 1998).

221 Being exclusively produced by the thermal depolymerization and dehydration of cellulose  
 222 and hemicellulose, levoglucosan has been used as a specific tracer for biomass burning  
 223 (Simoneit et al., 1999; Zhu et al., 2015b). Levoglucosan showed significantly higher levels ( $p$   
 224  $< 0.05$ ) in daytime ( $2.52 \pm 2.08 \text{ ng m}^{-3}$ ) than nighttime ( $1.14 \pm 0.94 \text{ ng m}^{-3}$ ). Moreover, we  
 225 found higher levels of levoglucosan in August 20–25 ( $2.97 \pm 1.64 \text{ ng m}^{-3}$ ) than August 26–30  
 226 ( $0.53 \pm 0.44 \text{ ng m}^{-3}$ ); those concentrations in the latter period are close to the regional  
 227 background level from Okinawa Island (Zhu et al., 2015b). In the nighttime, levoglucosan  
 228 may have been deposited to the canopy as a result of dampened vertical mixing and relatively  
 229 low wind speed (Figure S1). In addition, local burning activities could also contribute to the  
 230 daytime elevation of levoglucosan although they might be insignificant.

### 231 3.1.3 Daytime abundances of SOA tracers

232 A total of 11 compounds were detected as SOA tracers. Six isoprene-tracers, including 2-  
 233 methylglyceric acid (MGA), two 2-methyltetrols (2-methylthreitol and 2-methylerythritol,  
 234 MTLs), and three C5-alkene triols (3-methyl-2,3,4-trihydroxy-1-butene, cis-2-methyl-1,3,4-  
 235 trihydroxy-1-butene and trans-2-methyl-1,3,4-trihydroxy-1-butene, MTHBs), showed higher  
 236 levels in daytime (Figure 1j–l). Similar daytime abundances were also found for 4  
 237 monoterpene-tracers; pinonic acid (PNA), pinic acid (PA) ( $p < 0.05$ ), 3-hydroxyglutaric acid  
 238 (HGA) and 3-methyl-1,2,3-butanetricarboxylic acid (MBTCA) (Figure 1m–p). Total isoprene-  
 239 SOA tracers ( $281 \pm 274$  and  $199 \pm 207 \text{ ng m}^{-3}$  in daytime and nighttime, respectively) were  
 240 more abundant by a factor of  $\sim 5$  than total monoterpene-SOA tracers ( $54.6 \pm 50.2$  and  $36.3 \pm$   
 241  $33.6 \text{ ng m}^{-3}$ , respectively). Isoprene is more abundantly emitted than monoterpenes from this

**Deleted:** Given the location of Wakayama forest in the Kii Peninsular, the sea-land breeze system is very likely to deliver clean maritime air masses to the sampling site in daytime and drainage airflow from the Japanese islands in nighttime. The diurnal variation of levoglucosan with daytime maxima in the Wakayama aerosols indicates that the Asian outflow of biomass burning emissions approached to the sampling site.

250 coniferous forest. This is consistent with the observations at a mountain site in central Japan  
 251 (Fu et al., 2014). Sesquiterpene-tracer, caryophyllinic acid, showed consistently low levels in  
 252 both daytime ( $1.22 \pm 1.23 \text{ ng m}^{-3}$ ) and nighttime ( $0.94 \pm 0.83 \text{ ng m}^{-3}$ ) (Figure 1q). The  
 253 daytime abundances of isoprene- and monoterpene-tracers reflected the production of SOA by  
 254 the photooxidation of BVOC in the forest.

### 255 3.2 Influence of anthropogenic oxidant on SOA formation

256 The diurnal profile of SOA tracers showed a clear single peak pattern in the afternoon on  
 257 August 28–29. Total isoprene-tracers peaked at 15:00–18:00 ( $28.4 \text{ ng m}^{-3}$ ), while total  
 258 monoterpene-tracers peaked slightly earlier at 12:00–15:00 ( $12.7 \text{ ng m}^{-3}$ ) (Figure 3c–d). Their  
 259 afternoon peaks are consistent with the maxima of ambient temperature and solar radiation  
 260 (Figure 2). These results indicate that SOA is formed by photooxidation of isoprene and  
 261 monoterpenes emitted from local vegetation under natural conditions. Our results are  
 262 consistent with the afternoon peaks of semi-volatile oxygenated organic aerosol (SVOOA)  
 263 component determined by the positive matrix factorization of the AMS spectra collected  
 264 during the same campaign (Han et al., 2014), which were produced by photooxidation of  
 265 freshly emitted BVOC from the local forest.

266 Interestingly, on August 23–24, days with regional anthropogenic oxidant input, isoprene-  
 267 and monoterpene-tracers showed not only afternoon peaks at 12:00–15:00, but also nighttime  
 268 peaks (Figure 3c–d) following the intensive precipitation during 13:00–17:00 (Figure 2).  
 269 These results suggest that SOA is continuously produced even in nighttime with sufficient  
 270 oxidants. AMS observation in the same campaign indicated that highly oxidized low volatility  
 271 oxygenated organic aerosols (LVOOA) are even more abundant than that of SVOOA on

Deleted: 2c

Deleted: S1

Deleted: 2c

Deleted: S1

276 August 23–24, especially in nighttime (Han et al., 2014). Nighttime production of SOA was  
277 also observed in the United States (US) (Zhao et al., 2013).

278 Moreover, on days with regional input of oxidants, the SOA tracer levels were 1–2 orders  
279 of magnitude higher than those under natural conditions both in daytime and nighttime.  
280 Meanwhile, we found positive relations between  $\text{SO}_4^{2-}$  and isoprene-SOA tracers as well as  
281 monoterpene-SOA tracers (Table 1). These phenomena could be explained by the following  
282 reasons. Firstly, regional BSOA could be transported along with anthropogenic oxidants.  
283 Observations at Okinawa island, southern Japan indicated that the variations of monoterpene-  
284 SOA tracers and caryophyllinic acid are related to the continental outflow of BVOC oxidation  
285 products (Zhu et al., 2016). Secondly, the earlier generation products of BVOC oxidation tend  
286 to shift to the particle phase during gas/particle partitioning given their semivolatility nature  
287 (Cahill et al., 2006), such a shift might be more prominent on days with aged regional aerosols  
288 accompanied by a daytime increase of organics determined by AMS (Han et al., 2014). The  
289 third possibility is that the anthropogenic oxidants might promote BSOA formation. We focus  
290 on the third possibility and further testified this hypothesis.

291 We examined the degrees of BSOA tracer buildups in daytime as compared to nighttime  
292 ( $\Delta\text{BSOA} = \text{mean daytime BSOA tracer levels} - \text{mean nighttime BSOA tracer levels}$ ) (Table  
293 2).  $\Delta\text{BSOA}$  values on August 20–25 were higher by more than 1 order of magnitude than that  
294 on August 26–30. These results implied that, although transported BSOA might contribute to  
295 their elevation, anthropogenic oxidants substantially promoted the SOA formation in  
296 Wakayama forest. A recent field study in the southeastern US suggested that the formation of  
297 methyltetrols is mediated by  $\text{SO}_4^{2-}$ , being consistent with our results (Xu et al., 2015). They  
298 also reported that  $\text{NO}_3^{\cdot}$  radical was involved in the nighttime monoterpene oxidation.

299 However, inorganic  $\text{NO}_3^-$  did not correlate with monoterpene-SOA tracers during nighttime,  
300 indicating that the contribution of  $\text{NO}_3^\bullet$  radical to nighttime monoterpene oxidation is not  
301 clear in Wakayama aerosols, which deserve further investigations.

### 302 3.3 OC fractions from fungal spores and BVOC oxidation

303 The contributions of each source component to OC were estimated using tracer-based  
304 methods. OC fractions from fungal spores were estimated based on mannitol levels assuming  
305 that there were 1.7 pg mannitol and 13 pg OC per spore (Bauer et al., 2008). The secondary  
306 organic carbon (SOC) fraction resulting from VOC oxidation was estimated following  
307 Kleindienst et al. (2007) based on the chamber experiment. Contributions of plant debris to  
308 OC were estimated based on glucose following Puxbaum and Tenze-Kunit (2003).  
309 Contributions of biomass burning aerosols to OC were estimated based on levoglucosan  
310 following Zhu et al. (2015b). It is noteworthy that, although each tracer methods gave a  
311 reasonable estimate in the original studies, uncertainties would be introduced in the current  
312 study considering the site differences. Still, the estimations are inferable for the contributions  
313 from each source to OC in the forest aerosols.

314 Fungal spores contribute a major fraction (45%) to OC in nighttime. In daytime, although  
315 the mass fraction was about half to that in nighttime (22%), fungal spores are still the largest  
316 known source of OC (Figure 4). In comparison, BVOC oxidation products (BSOC) contribute  
317 to 15% and 19% of OC in nighttime and daytime, respectively. Interestingly, the large BSOC  
318 fraction of OC mainly occurred on days with anthropogenic influences (August 20–25) (17%  
319 in daytime and 23% in nighttime). On days close to natural conditions (August 26–29), BSOC  
320 has a small contribution to OC (4.0% in nighttime and 4.7% in daytime). The larger  
321 contributions of BSOC to OC might be associated with the BSOC that are transported from

Deleted: 3

323 the Asian continent, a stimulating effect of anthropogenic oxidants on daytime BSOA  
 324 formation, as well as the enhanced gas to particle conversion of BVOC. These results suggest  
 325 that increased fossil fuel combustion and the subsequent oxidant emissions would cause a  
 326 larger contribution of BSOA to OA, which may in part compensate the human-caused global  
 327 warming by acting as CCN. Such effects are supposed to be incorporated into model  
 328 simulations of the future climate in the Anthropocene.

329 It is noteworthy that the contribution of plant debris to OC (5.6% in nighttime and 4.6% in  
 330 daytime) could not be neglected. These fractions account for only the primary OC sources  
 331 based on glucose level, and could be underestimated. ~~Nevertheless, there are still quite~~  
 332 ~~amounts~~ of OC not ~~being~~ determined (34% and 51% in nighttime and daytime, respectively).

333 Other than the uncertainties introduced by the tracer methods, a notable fraction of OC could  
 334 be contributed from humic-like substances that are chemically and physically similar with  
 335 terrestrial and aquatic humic and fulvic acids (Graber and Rudich, 2006). Mono- and di-  
 336 carboxylic acids, originating from a broad range of primary organic compounds, could  
 337 contribute 38–44% of OC (Legrand et al., 2013). Pollen could also contribute to OC because  
 338 of its large size. Amines are another source of OC, but not well studied (Sintermann and  
 339 Neftel, 2015). These sources from various sectors need to be further characterized for an  
 340 unambiguous understanding of the sources of forest aerosols.

341 Among few studies on the observation-based quantification of OC/OA sources of forest  
 342 aerosols, our results are in accordance with those in the Amazon rainforest, where primary  
 343 biological aerosol and SOA accounted for 68.5% and 18.8% of total particle masses, without  
 344 consideration of the diurnal variations (Pöschl et al., 2010). At an urban site with various OA  
 345 sources, Bakersfield, California, Zhao et al. (2013) reported that SOA accounted for 78% and

**Deleted:** Significant

**Deleted:** fractions

**Deleted:** (34% and 51%) of are

349 66% of OA during the daytime and the nighttime, respectively, while primary sources  
350 accounted for 15% of OA. Under a changing climate and uncertain anthropogenic emission  
351 scenario, although OA could be contributed by complicated sources in a pristine forest  
352 environment, our results demonstrate that biogenic particles and gases are rather the major  
353 sources of organic aerosols in the forest atmosphere.

354

#### 355 **4. Conclusions**

356 We collected daytime and nighttime samples in a mid-latitude coniferous forest in  
357 Wakayama, central Japan. Focusing on fungal spores and BSOA, we quantified organic  
358 tracers containing information of various aerosol sources. Nighttime higher levels of trehalose  
359 and sugar alcohols were clarified under near saturated relative humidity, indicating the  
360 flourishing of fungal sporulation. BSOA tracers were more abundant in the daytime, indicating  
361 their photooxidation production among other sources. Enhanced BSOA tracer levels were  
362 observed on days with notable input of anthropogenic oxidant. Using tracer-based methods,  
363 we estimated that fungal spores contribute dominantly to OC in forest aerosols not only in the  
364 nighttime, but also in the daytime. The study emphasizes the importance of fungal spores in  
365 affecting biogenic aerosols in forest ecosystem.

366

#### 367 **Acknowledgement**

368 This study was supported in part by the Japan Society for the Promotion of Science (Grant-  
369 in-Aid Nos. 19204055 and 24221001), the Environment Research and Technology  
370 Development Fund (B-0903) from the Ministry of the Environment, Japan, and the Program  
371 for Improvement of Research Environment for Young Researchers from Special Coordination



372 Funds for Promoting Science and Technology commissioned by Ministry of Education,  
373 Culture, Sports, Science and Technology, Japan. The authors thank the faculty and staff of  
374 Wakayama Forest Research Station (WFRS), Field Science Education and Research Center of  
375 Kyoto University, Japan, for the use of the site for aerosol sampling. The authors also thank Y.  
376 Han for her contribution to the aerosol sampling, and Y. Han and K. Kawana for their  
377 cooperation in the field observation. The meteorological data were provided by WFRS. The  
378 authors appreciate the experimental support of P. Fu and technical support of W. Zhang. The  
379 data of this study is available upon request to C. Zhu.

### 381 **References**

- 382
- 383 Acosta Navarro, J. C., Smolander, S., Struthers, H., Zorita, E., Ekman, A. M., Kaplan, J.,  
384 Guenther, A., Arneth, A., and Riipinen, I.: Global emissions of terpenoid VOCs from  
385 terrestrial vegetation in the last millennium, *J. Geophys. Res.*, 119, 6867–6885, 2014.
- 386 Baker, H. G., Baker, I., and Hodges, S. A.: Sugar composition of nectars and fruits consumed  
387 by birds and bats in the tropics and subtropics I, *Biotropica*, 30, 559–586, 1998.
- 388 Bauer, H., Claeys, M., Vermeylen, R., Schueller, E., Weinke, G., Berger, A., and Puxbaum,  
389 H.: Arabitol and mannitol as tracers for the quantification of airborne fungal spores, *Atmos.*  
390 *Environ.*, 42, 588–593, 2008.
- 391 Birch, M., and Cary, R.: Elemental carbon-based method for monitoring occupational  
392 exposures to particulate diesel exhaust, *Aero. Sci. Technol.*, 25, 221–241, 1996.
- 393 Blake, R. S., Monks, P. S., and Ellis, A. M.: Proton-transfer reaction mass spectrometry.  
394 *Chem. Rev.*, 109, 861–896, 2009.
- 395 Burrows, S. M., Elbert, W., Lawrence, M. G., and Pöschl, U.: Bacteria in the global  
396 atmosphere - Part 1: Review and synthesis of literature data for different ecosystems,  
397 *Atmos. Chem. Phys.*, 9, 9263–9280, 2009.

Formatted: Font:Not Italic

Formatted: Font:Not Italic

- 398 Cahill, T. M., Seaman, V. Y., Charles, M. J., Holzinger, R., and Goldstein, A. H.: Secondary  
399 organic aerosols formed from oxidation of biogenic volatile organic compounds in the  
400 Sierra Nevada Mountains of California, *J. Geophys. Res.*, 111, D16312, 2006.
- 401 Carlton, A. G., Pinder, R. W., Bhawe, P. V., and Pouliot, G. A.: To what extent can biogenic  
402 SOA be controlled?, *Environ. Sci. Technol.*, 44, 3376–3380, 2010.
- 403 Claeys, M., Graham, B., Vas, G., Wang, W., Vermeylen, R., Pashynska, V., Cafmeyer, J.,  
404 Guyon, P., Andreae, M. O., Artaxo, P., and Maenhaut, W.: Formation of secondary organic  
405 aerosols through photooxidation of isoprene, *Science*, 303, 1173–1176, 2004.
- 406 Després, V. R., Huffman, J. A., Burrows, S. M., Hoose, C., Safatov, A. S., Buryak, G.,  
407 Fröhlich–Nowoisky, J., Elbert, W., Andreae, M. O., Pöschl, U., and Jaenicke, R.: Primary  
408 biological aerosol particles in the atmosphere: a review, *Tellus*, 64B, 15598, 2012.
- 409 Elbert, W., Taylor, P. E., Andreae, M. O., and Pöschl, U.: Contribution of fungi to primary  
410 biogenic aerosols in the atmosphere: wet and dry discharged spores, carbohydrates, and  
411 inorganic ions, *Atmos. Chem. Phys.*, 7, 4569–4588, 2007.
- 412 Fröhlich–Nowoisky, J., Pickersgill, D. A., Després, V. R., and Pöschl, U.: High diversity of  
413 fungi in air particulate matter, *Proc. Nat. Acad. Sci.*, 106, 12814–12819, 2009.
- 414 Fu, P., Kawamura, K., Chen, J., and Miyazaki, Y.: Secondary production of organic aerosols  
415 from biogenic VOCs over Mt. Fuji, Japan, *Environ. Sci. Technol.*, 48, 8491–8497, 2014.
- 416 Graber, E., and Rudich, Y.: Atmospheric HULIS: How humic-like are they? A comprehensive  
417 and critical review, *Atmos. Chem. Phys.*, 6, 729–753, 2006.
- 418 Graham, B., Guyon, P., Taylor, P. E., Artaxo, P., Maenhaut, W., Glovsky, M. M., Flagan, R.  
419 C., and Andreae, M. O.: Organic compounds present in the natural Amazonian aerosol:  
420 Characterization by gas chromatography–mass spectrometry, *J. Geophys. Res.*, 108, 4766,  
421 2003.
- 422 Guenther, A., Karl, T., Harley, P., Wiedinmyer, C., Palmer, P. I., and Geron, C.: Estimates of  
423 global terrestrial isoprene emissions using MEGAN (Model of Emissions of Gases and  
424 Aerosols from Nature), *Atmos. Chem. Phys.*, 6, 3181–3210, 2006.
- 425 Han, Y., Iwamoto, Y., Nakayama, T., Kawamura, K., Hussein, T., and Mochida, M.:  
426 Observation of new particle formation over a mid–latitude forest facing the North Pacific,  
427 *Atmos. Environ.*, 64, 77–84, 2013.

- 428 Han, Y., Iwamoto, Y., Nakayama, T., Kawamura, K., and Mochida, M.: Formation and  
429 evolution of biogenic secondary organic aerosol over a forest site in Japan, *J. Geophys.*  
430 *Res.*, 119, 259–273, 2014.
- 431 Heald, C. L., and Spracklen, D. V.: Atmospheric budget of primary biological aerosol particles  
432 from fungal spores, *Geophys. Res. Lett.*, 36, L09806, 2009.
- 433 Hiranuma, N., Möhler, O., Yamashita, K., Tajiri, T., Saito, A., Kiselev, A., Hoffmann, N.,  
434 Hoose, C., Jantsch, E., and Koop, T.: Ice nucleation by cellulose and its potential  
435 contribution to ice formation in clouds, *Nat. Geosci.*, 8, 273–277, 2015.
- 436 Hoose, C., Kristjánsson, J., and Burrows, S.: How important is biological ice nucleation in  
437 clouds on a global scale?, *Environ. Res. Lett.*, 5, 024009, 2010.
- 438 Huffman, J., Treutlein, B., and Pöschl, U.: Fluorescent biological aerosol particle  
439 concentrations and size distributions measured with an Ultraviolet Aerodynamic Particle  
440 Sizer (UV-APS) in Central Europe, *Atmos. Chem. Phys.*, 10, 3215–3233, 2010.
- 441 Huffman, J. A., Prenni, A. J., DeMott, P. J., Pöhlker, C., Mason, R. H., Robinson, N. H.,  
442 Fröhlich-Nowoisky, J., Tobo, Y., Després, V. R., Garcia, E., Gochis, D. J., Harris, E.,  
443 Müller-Germann, I., Ruzene, C., Schmer, B., Sinha, B., Day, D. A., Andreae, M. O.,  
444 Jimenez, J. L., Gallagher, M., Kreidenweis, S. M., Bertram, A. K., and Pöschl, U.: High  
445 concentrations of biological aerosol particles and ice nuclei during and after rain, *Atmos.*  
446 *Chem. Phys.*, 13, 6151–6164, 2013.
- 447 Jaenicke, R.: Abundance of cellular material and proteins in the atmosphere, *Science*, 308, 73,  
448 2005.
- 449 Jia, Y., and Fraser, M.: Characterization of saccharides in size-fractionated ambient  
450 particulate matter and aerosol sources: the contribution of primary biological aerosol  
451 particles (PBAPs) and soil to ambient particulate matter, *Environ. Sci. Technol.*, 45, 930–  
452 936, 2011.
- 453 [Kawamura, K., Kasukabe, H., and Barrie, L. A.: Secondary formation of water-soluble](#)  
454 [organic acids and  \$\alpha\$ -dicarbonyls and their contributions to total carbon and water-soluble](#)  
455 [organic carbon: Photochemical aging of organic aerosols in the Arctic spring, \*J. Geophys.\*](#)  
456 [Res.](#), 115, D21306, doi: 10.1029/2010D014299, 2010.

- 457 Kleindienst, T. E., Jaoui, M., Lewandowski, M., Offenberg, J. H., Lewis, C. W., Bhave, P. V.,  
458 and Edney, E. O.: Estimates of the contributions of biogenic and anthropogenic  
459 hydrocarbons to secondary organic aerosol at a southeastern US location, *Atmos. Environ.*,  
460 41, 8288–8300, 2007.
- 461 Kourtchev, I., Ruuskanen, T., Keronen, P., Sogacheva, L., Dal Maso, M., Reissell, A., Chi, X.,  
462 Vermeylen, R., Kulmala, M., and Maenhaut, W.: Determination of isoprene and  $\alpha$ - $\beta$ -  
463 pinene oxidation products in boreal forest aerosols from Hyytiälä, Finland: diel variations  
464 and possible link with particle formation events, *Plant Bio.*, 10, 138–149, 2008.
- 465 Legrand, M., Preunkert, S., May, B., Guilhermet, J., Hoffman, H., and Wagenbach, D.: Major  
466 20th century changes of the content and chemical speciation of organic carbon archived in  
467 Alpine ice cores: Implications for the long-term change of organic aerosol over Europe, *J.*  
468 *Geophys. Res.*, 118, 3879–3890, 2013.
- 469 Manninen, H. E., Bäck, J., Sihto–Nissilä, S.–L., Huffman, J. A., Pessi, A.–M., Hiltunen, V.,  
470 Aalto, P. P., Hidalgo Fernández, P. J., Hari, P., and Saarto, A.: Patterns in airborne pollen  
471 and other primary biological aerosol particles (PBAP), and their contribution to aerosol  
472 mass and number in a boreal forest, *Bor. Environ. Res.*, 19, 383–405, 2014.
- 473 Matsunaga, S. N., Mochizuki, T., Ohno, T., Endo, Y., Kusumoto, D., and Tani, A.:  
474 Monoterpene and sesquiterpene emissions from Sugi (*Cryptomeria japonica*) based on a  
475 branch enclosure measurements, *Atmos. Pollut. Res.*, 2, [16–23](#), 2011.
- 476 Medeiros, P. M., Conte, M. H., Weber, J. C., and Simoneit, B. R.: Sugars as source indicators  
477 of biogenic organic carbon in aerosols collected above the Howland Experimental Forest,  
478 Maine, *Atmos. Environ.*, 40, 1694–1705, 2006.
- 479 Miyazaki, Y., Jung, J., Fu, P., Mizoguchi, Y., Yamanoi, K., and Kawamura, K.: Evidence of  
480 formation of submicrometer water-soluble organic aerosols at a deciduous forest site in  
481 northern Japan in summer, *J. Geophys. Res.*, 117, D19213, 2012.
- 482 Mochizuki, T., Endo, Y., Matsunaga, S., Chang, J., Ge, Y., Huang, C., and Tani, A.: Factors  
483 affecting monoterpene emission from *Chamaecyparis obtusa*, *Geochemical J.*, 45, 15–22,  
484 2011.
- 485 Mochizuki, T., Miyazaki, Y., Ono, K., Wada, R., Takahashi, Y., Saigusa, N., Kawamura, K.,  
486 and Tani, A.: Emissions of biogenic volatile organic compounds and subsequent formation

- 487 of secondary organic aerosols in a *Larix kaempferi* forest, *Atmos. Chem. Phys.*, 15, 12029–  
488 12041, 2015.
- 489 Pöhlker, C., Huffman, J., and Pöschl, U.: Autofluorescence of atmospheric bioaerosols-  
490 fluorescent biomolecules and potential interferences, *Atmos. Meas. Tech.*, 5, 37–71, 2012.
- 491 Pöschl, U., Martin, S., Sinha, B., Chen, Q., Gunthe, S., Huffman, J., Borrmann, S., Farmer, D.,  
492 Garland, R., and Helas, G.: Rainforest aerosols as biogenic nuclei of clouds and  
493 precipitation in the Amazon, *Science*, 329, 1513–1516, 2010.
- 494 Puxbaum, H., and Tenze-Kunit, M.: Size distribution and seasonal variation of atmospheric  
495 cellulose, *Atmos. Environ.*, 37, 3693–3699, 2003.
- 496 Rogge, W. F., Medeiros, P. M., and Simoneit, B. R.: Organic marker compounds in surface  
497 soils of crop fields from the San Joaquin Valley fugitive dust characterization study, *Atmos.*  
498 *Environ.*, 41, 8183–8204, 2007.
- 499 Simoneit, B. R., Schauer, J. J., Nolte, C., Oros, D. R., Elias, V. O., Fraser, M., Rogge, W., and  
500 Cass, G. R.: Levoglucosan, a tracer for cellulose in biomass burning and atmospheric  
501 particles, *Atmos. Environ.*, 33, 173–182, 1999.
- 502 Simoneit, B. R., Elias, V. O., Kobayashi, M., Kawamura, K., Rushdi, A. I., Medeiros, P. M.,  
503 Rogge, W. F., and Didyk, B. M.: Sugars dominant water-soluble organic compounds in  
504 soils and characterization as tracers in atmospheric particulate matter, *Environ. Sci.*  
505 *Technol.*, 38, 5939–5949, 2004.
- 506 Sintermann, J., and Neftel, A.: Ideas and perspectives: on the emission of amines from  
507 terrestrial vegetation in the context of new atmospheric particle formation, *Biogeosci.*, 12,  
508 3225–3240, 2015.
- 509 Spracklen, D. V., and Heald, C. L.: The contribution of fungal spores and bacteria to regional  
510 and global aerosol number and ice nucleation immersion freezing rates, *Atmos. Chem.*  
511 *Phys.*, 14, 9051–9059, 2014.
- 512 Xu, L., Guo, H., Boyd, C. M., Klein, M., Bougiatioti, A., Cerully, K. M., Hite, J. R.,  
513 Isaacman-VanWertz, G., Kreisberg, N. M., Knote, C., Olson, K., Koss, A., Goldstein, A.  
514 H., Hering, S. V., de Gouw, J., Baumann, K., Lee, S.-H., Nenes, A., Weber, R. J., and Ng,  
515 N. L.: Effects of anthropogenic emissions on aerosol formation from isoprene and  
516 monoterpenes in the southeastern United States, *Proc. Nat. Acad. Sci.*, 112, 37–42, 2015.

- 517 Yttri, K., Aas, W., Bjerke, A., Cape, J., Cavalli, F., Ceburnis, D., Dye, C., Emblico, L.,  
518 Facchini, M., and Forster, C.: Elemental and organic carbon in PM<sub>10</sub>: a one year  
519 measurement campaign within the European Monitoring and Evaluation Programme  
520 EMEP, *Atmos. Chem. Phys.*, *7*, 5711–5725, 2007.
- 521 Zhang, Q., Jimenez, J., Canagaratna, M., Allan, J., Coe, H., Ulbrich, I., Alfarra, M., Takami,  
522 A., Middlebrook, A., and Sun, Y.: Ubiquity and dominance of oxygenated species in  
523 organic aerosols in anthropogenically-influenced Northern Hemisphere midlatitudes,  
524 *Geophys. Res. Lett.*, *34*, L13801, 2007.
- 525 Zhao, Y., Kreisberg, N. M., Worton, D. R., Isaacman, G., Gentner, D. R., Chan, A. W.,  
526 Weber, R. J., Liu, S., Day, D. A., and Russell, L. M.: Sources of organic aerosol  
527 investigated using organic compounds as tracers measured during CalNex in Bakersfield, J.  
528 *Geophys. Res.*, *118*, 11,388–11,398, 2013.
- 529 Zhu, C., Kawamura, K., and Fu, P.: Seasonal variations of biogenic secondary organic aerosol  
530 tracers in Cape Hedo, Okinawa, *Atmos. Environ.*, *130*, 113–119, 2016.
- 531 Zhu, C., Kawamura, K., and Kunwar, B.: Organic tracers of primary biological aerosol  
532 particles at subtropical Okinawa Island in the western North Pacific Rim, *J. Geophys. Res.*,  
533 *120*, 5504–5523, 2015a.
- 534 Zhu, C., Kawamura, K., and Kunwar, B.: Effect of biomass burning over the western North  
535 Pacific Rim: wintertime maxima of anhydrosugars in ambient aerosols from Okinawa,  
536 *Atmos. Chem. Phys.*, *15*, 1959–1973, 2015b.
- 537 Ziemann, P. J., and Atkinson, R.: Kinetics, products, and mechanisms of secondary organic  
538 aerosol formation, *Chem. Soc. Rev.*, *41*, 6582–6605, 2012.
- 539  
540

Deleted: doi:10.1016/j.atmosenv.2015.08.069,

542 Table 1. Linear correlation coefficients ( $r$ ) between secondary organic aerosol tracers and  
 543  $\text{NO}_3^-$  and  $\text{SO}_4^{2-}$  in forest aerosols during August 20–30, 2010, Wakayama, central Japan.

|                    |             | MGA <sup>a</sup>     | C5T                 | MTLs                | Isoprene<br>tracers | 3-HGA               | MBTCA               | PA                  | PNA                 | Monoterpene<br>tracers |
|--------------------|-------------|----------------------|---------------------|---------------------|---------------------|---------------------|---------------------|---------------------|---------------------|------------------------|
| $\text{NO}_3^-$    | All dataset | 0.08                 | -0.13 <sup>b</sup>  | -0.06               | -0.09               | -0.11               | -0.01               | -0.02               | 0.18                | -0.06                  |
|                    | Daytime     | -0.07                | -0.26               | -0.15               | -0.2                | -0.27               | -0.22               | -0.25               | 0.01                | -0.25                  |
|                    | Nighttime   | -0.32                | -0.36               | -0.34               | -0.35               | -0.30               | -0.18               | -0.33               | -0.19               | -0.27                  |
| $\text{SO}_4^{2-}$ | All dataset | 0.84 <sup>***c</sup> | 0.87 <sup>***</sup> | 0.84 <sup>***</sup> | 0.86 <sup>***</sup> | 0.91 <sup>***</sup> | 0.9 <sup>***</sup>  | 0.70 <sup>***</sup> | 0.65 <sup>***</sup> | 0.91 <sup>***</sup>    |
|                    | Daytime     | 0.86 <sup>***</sup>  | 0.89 <sup>***</sup> | 0.84 <sup>***</sup> | 0.88 <sup>***</sup> | 0.91 <sup>***</sup> | 0.92 <sup>***</sup> | 0.76 <sup>***</sup> | 0.67 <sup>**</sup>  | 0.92 <sup>***</sup>    |
|                    | Nighttime   | 0.82 <sup>***</sup>  | 0.82 <sup>***</sup> | 0.82 <sup>***</sup> | 0.83 <sup>***</sup> | 0.90 <sup>***</sup> | 0.86 <sup>***</sup> | 0.53 <sup>*</sup>   | 0.58 <sup>*</sup>   | 0.89 <sup>***</sup>    |

545 <sup>a</sup> Secondary organic aerosol tracer compounds are as follows: MGA, 2-methylglyceric acid; C5T, C5-alkene  
 546 triols; MTLs, 2-methyltetrols; PA, pinic acid; PNA, pinonic acid; 3-HGA, 3-hydroxyglutaric acid, MBTCA, 3-  
 547 methyl-1, 2, 3-butanetricarboxylic acid.

548 <sup>b</sup> Negative values indicate negative correlations.

549 <sup>c</sup> \*,  $p < 0.05$ ; \*\*,  $p < 0.01$ ; \*\*\*,  $p < 0.001$ .

550

551

552 Table 2. Daytime buildups (differences between daytime and nighttime levels) of SOA tracers  
 553 on days with (August 20–25) and without (August 26–30) input of anthropogenic oxidants in  
 554 forest aerosols, Wakayama, central Japan.

| Period        | MGA <sup>a</sup> | C5T  | MTLs | Isoprene tracers | 3-HGA | MBTCA | PA   | PNA  | Monoterpene tracers | CPA  | BSOA tracers |
|---------------|------------------|------|------|------------------|-------|-------|------|------|---------------------|------|--------------|
| August, 20–25 | 2.06             | 47.1 | 60.9 | 110              | 14.1  | 12.0  | 3.31 | 1.52 | 30.9                | 0.10 | 141          |
| August, 26–30 | 0.02             | 1.73 | 2.33 | 4.08             | 0.16  | 0.22  | 0.37 | 1.18 | 1.93                | 0.51 | 6.53         |
| August, 20–30 | 1.17             | 27.2 | 35.3 | 63.7             | 7.98  | 6.87  | 2.03 | 1.37 | 18.2                | 0.28 | 82.2         |

555 <sup>a</sup> Secondary organic aerosol tracer compounds are as follows: MGA, 2-methylglyceric acid; C5T, C5-alkene  
 556 triols; MTLs, 2-methyltetrols; PA, pinic acid; PNA, pinonic acid; 3-HGA, 3-hydroxyglutaric acid, MBTCA, 3-  
 557 methyl-1, 2, 3-butanetricarboxylic acid; CPA,  $\beta$ -caryophyllinic acid; BSOA tracers are the sum of isoprene-,  
 558 monoterpene- and sesquiterpene- (CPA) tracers.  
 559

Deleted: some



561 **Figure captions**

562

563 Figure 1. Diurnal variations of organic compounds in forest aerosols in Wakayama, Japan  
564 during August 20–30, 2010. The 10th, 25th, 50th, 75th, and 90th percentiles of the nighttime  
565 and daytime samples were shown in the box-whisker plot. The means were shown in solid  
566 circles. Statistically significances were also shown (T-test, \*,  $p < 0.05$ ; \*\*,  $p < 0.01$ ).

567

568 Figure 2. Meteorological parameters over August 20–30, 2010 at Wakayama forest, for (a)  
569 averaged diurnal variations of temperature, relative humidity and solar radiation, and (b)  
570 hourly means over the periods. Hourly precipitation was also shown in panel (b).

571

572 Figure 3. Diurnal profiles of organic compounds in forest aerosols in Wakayama on August  
573 23–24 (left) and August 28–29, 2010 (right).

574

575 Figure 4. Contributions from different sources to organic carbon in Wakayama forest aerosols  
576 during the nighttime and the daytime.

577

Deleted: 2

Deleted: 3

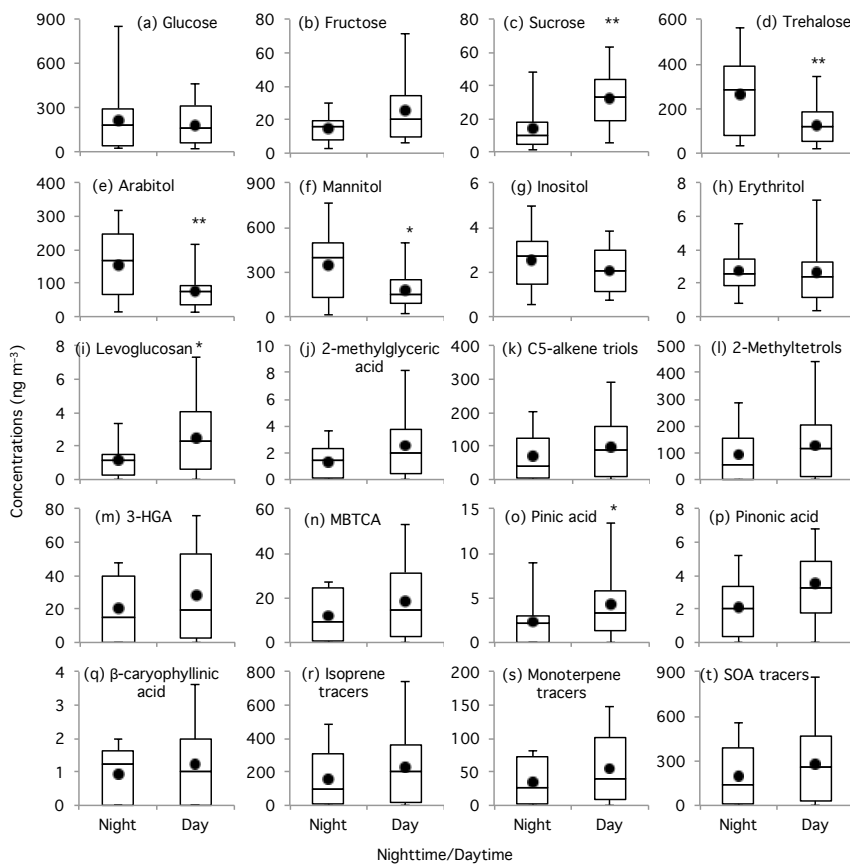

580

581 Figure 1. Diurnal variations of organic compounds in forest aerosols in Wakayama, Japan  
 582 during August 20–30, 2010. The 10th, 25th, 50th, 75th, and 90th percentiles of the nighttime  
 583 and daytime samples were shown in the box-whisker plot. The means were shown in solid  
 584 circles. Statistical significances were also shown (T-test, \*,  $p < 0.05$ ; \*\*,  $p < 0.01$ ).

585

586

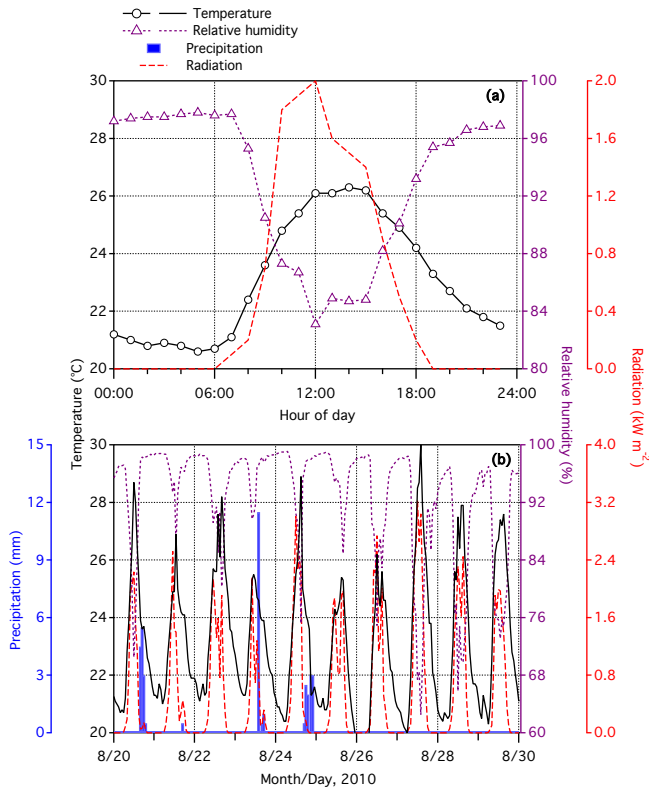

587 Figure 2. Meteorological parameters over August 20–30, 2010 at Wakayama forest, for (a)  
588 averaged diurnal variations of temperature, relative humidity and solar radiation, and (b)  
589 hourly means over the periods. Hourly precipitation was also shown in panel (b).  
590

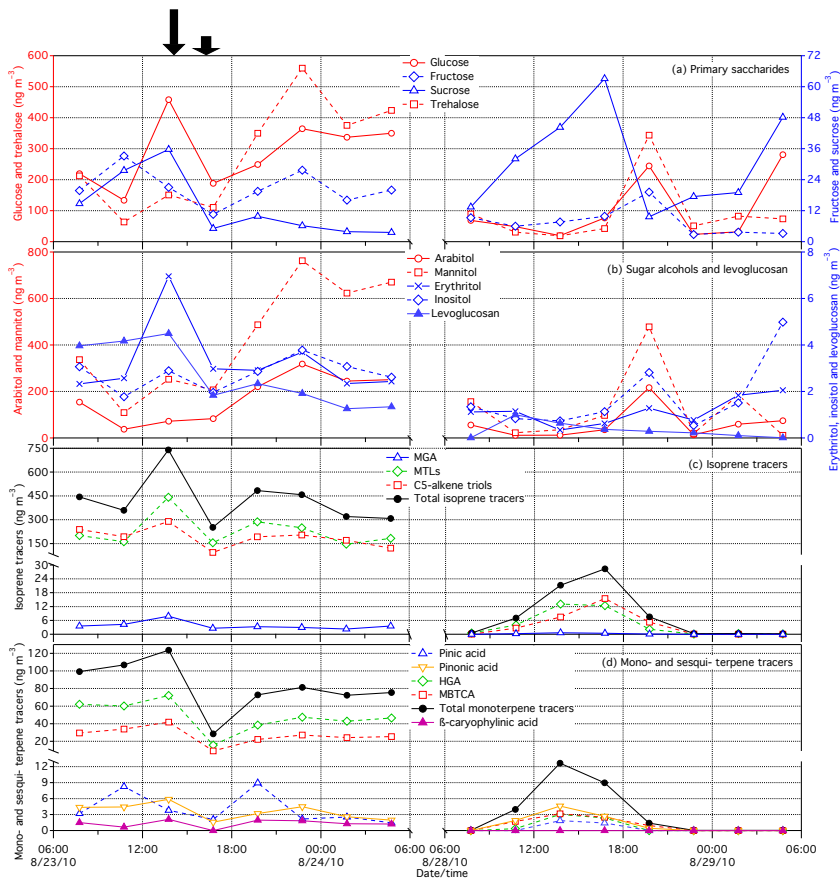

591

592 Figure 3. Diurnal profiles of organic compounds in forest aerosols in Wakayama on August  
 593 23–24 (left) and August 28–29 (right), 2010. Precipitation events occurred on 13:00–14:00  
 594 (11.2 mm) and 15:00–17:00 (1.5 mm) local time, August 23 as were marked by arrows on top  
 595 of the left panels.

Deleted: 2

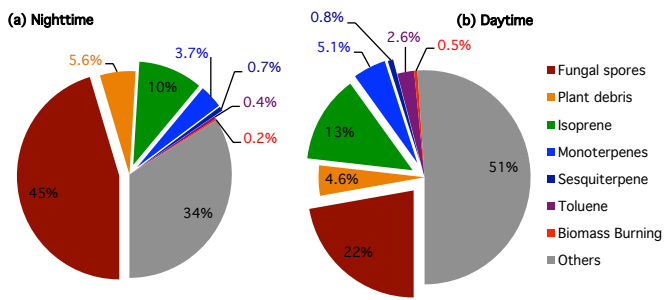

597

598 Figure 4. Contributions from different sources to organic carbon in Wakayama forest aerosols  
599 during the nighttime and the daytime.

600

Deleted: 3

Chunmao Zhu<sup>1</sup>, Kimitaka Kawamura<sup>1</sup>, Yasuro Fukuda<sup>1</sup>, Michihiro Mochida<sup>2</sup>, Yoko  
Iwamoto<sup>2,3</sup>

<sup>1</sup> Institute of Low Temperature Science, Hokkaido University, Sapporo 060-0819, Japan

<sup>2</sup> Graduate School of Environmental Studies, Nagoya University, Nagoya 464-8601, Japan

<sup>3</sup> Now at Faculty of Science Division I, Tokyo University of Science, Tokyo 162-8601, Japan
